# Supplementary material
Source: ML conference proceedings conference paper supplement (https://proceedings.neurips.cc/paper_files/paper/2009/hash/57aeee35c98205091e18d1140e9f38cf-Abstract.html)
Supplement: Supplementary file [file 57aeee35c98205091e18d1140e9f38cf-Supplemental.zip]

---

# Optimal context separation of spiking haptic signals by second-order somatosensory neurons

---

**Romain Brasselet**

CNRS - UPMC Univ Paris 6, UMR 7102  
F 75005, Paris, France  
romain.brasselet@upmc.fr

**Roland S. Johansson**

UMEA Univ, Dept Integr Medical Biology  
SE-901 87 Umea, Sweden  
roland.s.johansson@physiol.umu.se

**Angelo Arleo**

CNRS - UPMC Univ Paris 6, UMR 7102  
F 75005, Paris, France  
angelo.arleo@upmc.fr

There is a sign error in Equation 15 of the Supporting Material. The correct equation is:

$$\Delta w_i = \begin{cases} A \cdot \exp(\frac{t_{pre} - t_{post}}{\tau}) & t_{pre} - t_{post} < 0 \\ -A \cdot \exp(\frac{t_{post} - t_{pre}}{\tau}) & t_{pre} - t_{post} > 0 \end{cases} \quad (15)$$
